# Supplementary figures and images for: A general relationship links gait mechanics and running ground reaction forces
Source: Oxford University Press journal article supplement (doi:10.1242/jeb.138057), 2016-01-01

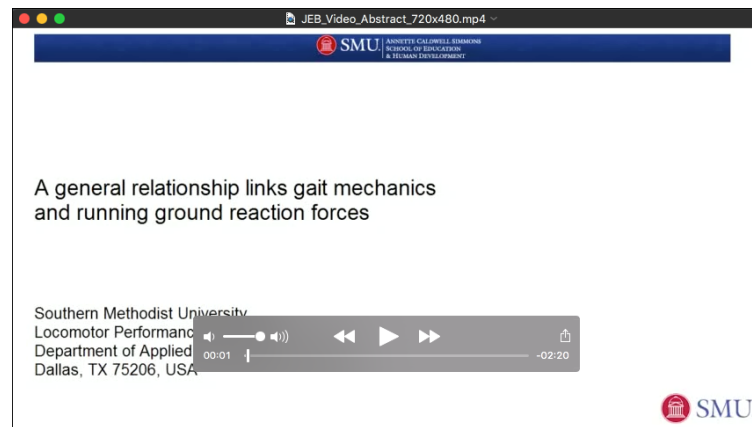

Supplement: jeb138057supp.pdf [file jeb138057supp.pdf]
